# Supplementary material for: Hybrid silane coating reinforced with silanized graphene oxide nanosheets with improved corrosion protective performance
Source: Royal Society of Chemistry journal article supplement (doi:10.1039/c6ra04843a), 2016-01-01
Supplement: c6ra04843a1.pdf [file c6ra04843a1.pdf]

## Supplementary information

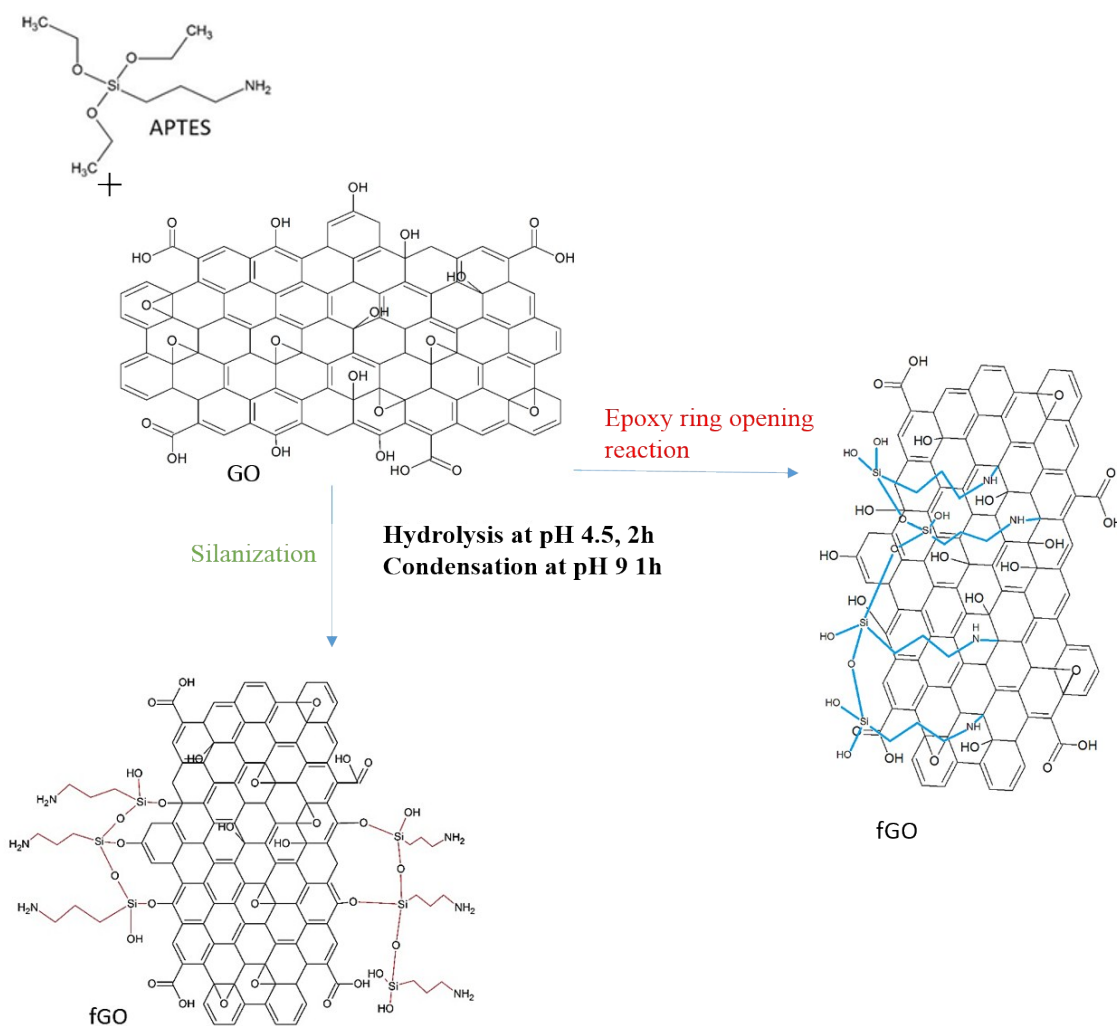

**Fig. S1.** Schematic of two possible mechanism for surface functionalization of GO by APTES; silanization and epoxy ring opening.

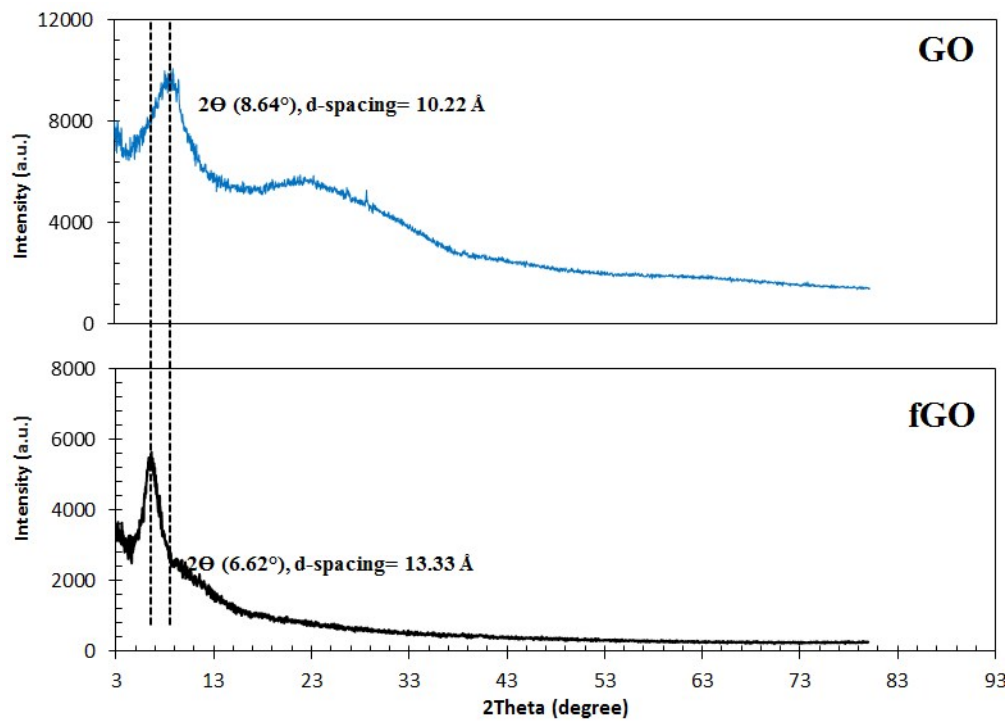

Fig. S2. XRD patterns for the GO and fGO nanosheets.

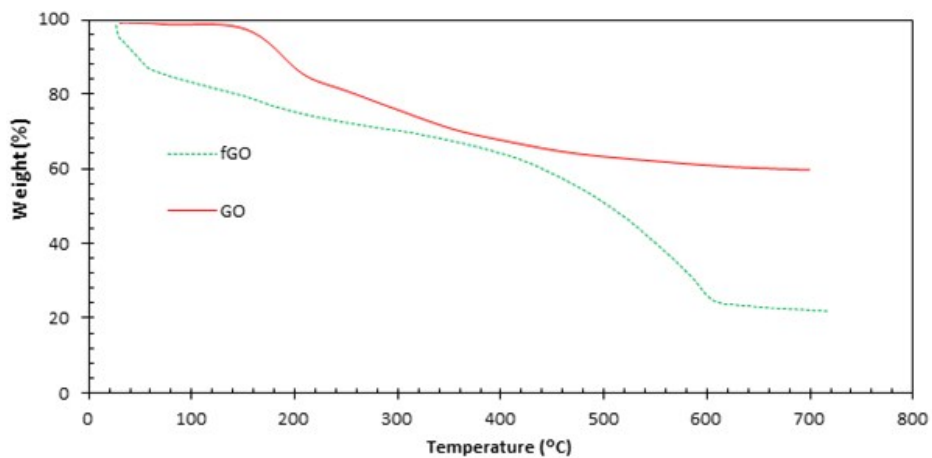

Fig. S3. TGA profiles for GO and fGO nanosheets.

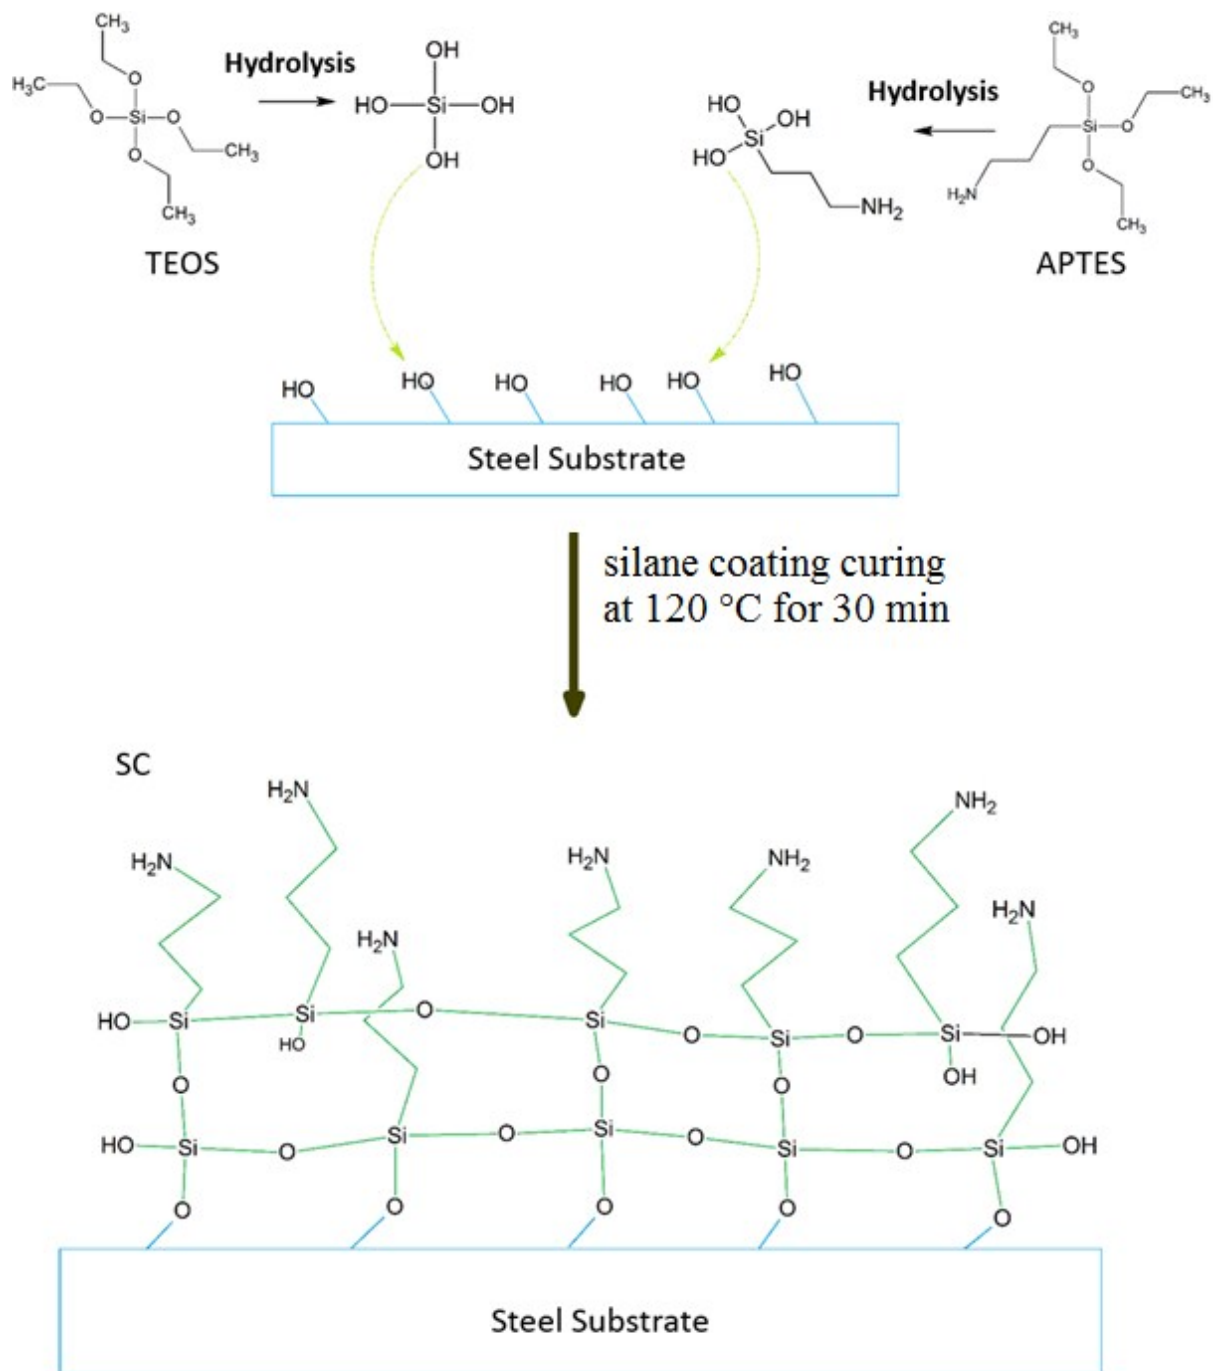

**Fig. S4.** Film formation of silane coating on steel substrate .

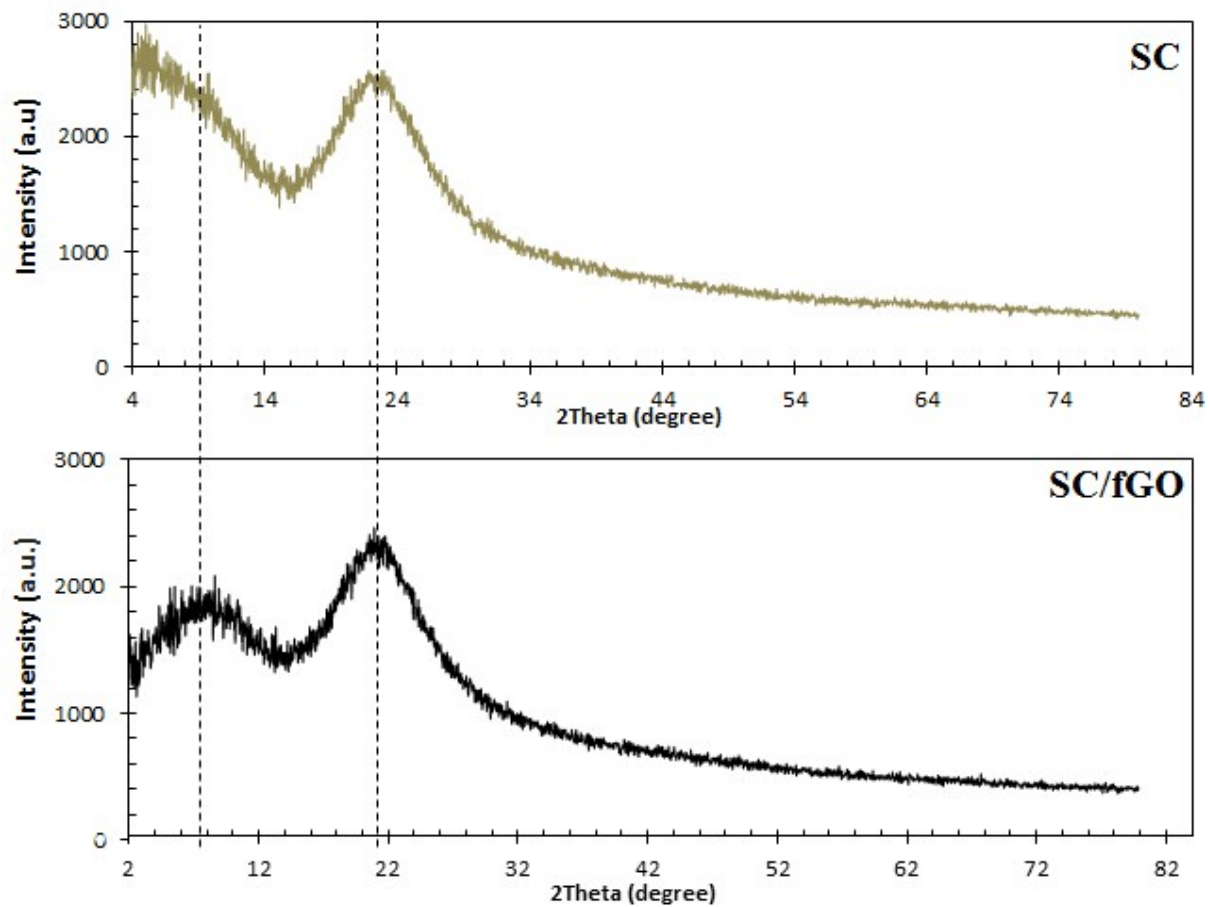

Fig. S5. XRD patterns for the SC and SC/fGO.

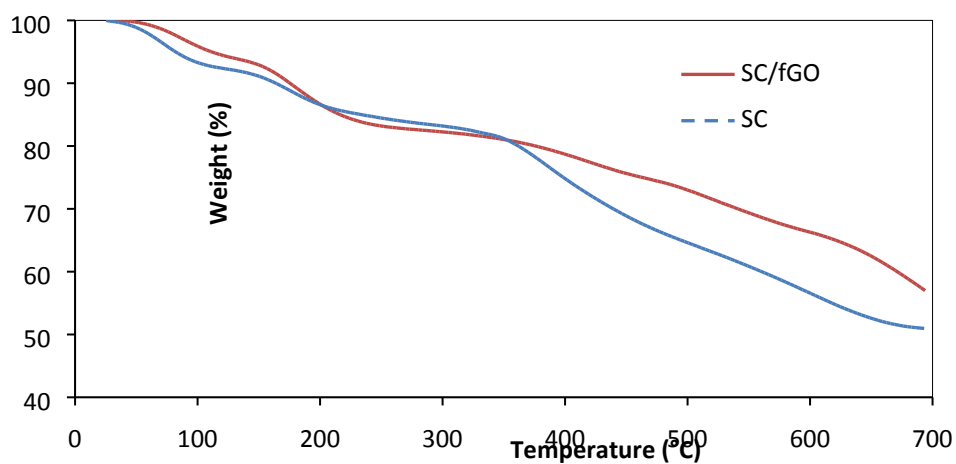

Fig. S6. TGA profiles for SC/fGO and SC.

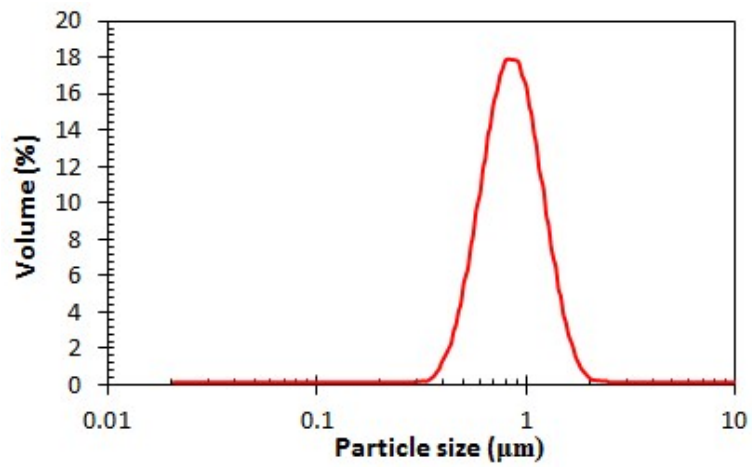

Fig. S7. Particle size distribution of fGO nanosheets in silane solution.
